# Supplementary material for: An inducible intestinal epithelial cell-specific NHE3 knockout mouse model mimicking congenital sodium diarrhea
Source: Oxford University Press journal article supplement (doi:10.1042/cs20200065), 2020-03-30
Supplement: cs-2020-0065_supp.pdf [file cs-2020-0065_supp.pdf]

**(A) NHE3<sup>IEC-KO</sup>**  
Normal colon  
mucosa, score 0

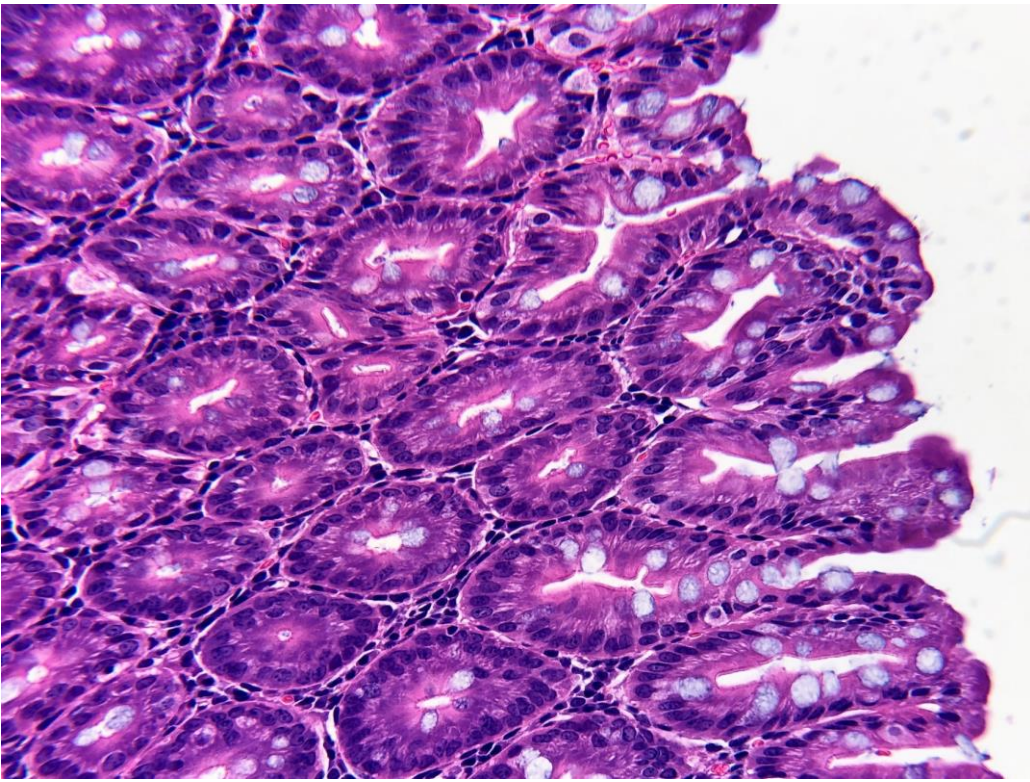

**(B) NHE3<sup>IEC-KO</sup>**  
Abnormal colon  
mucosa, colitis  
score 1

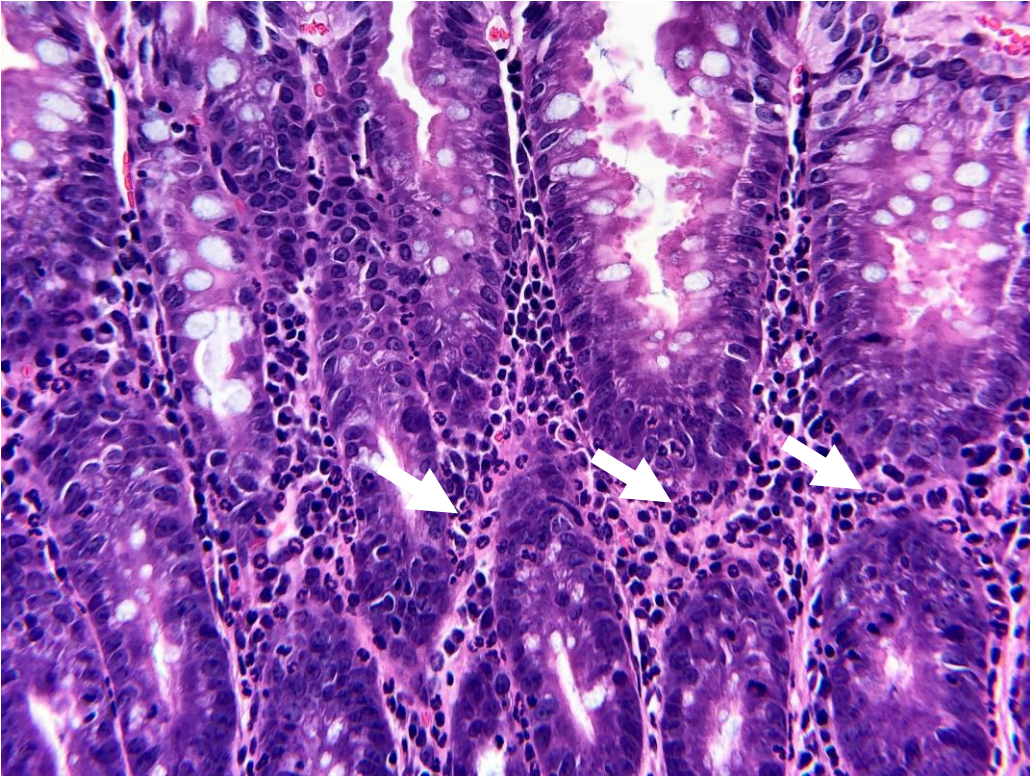

**(C) NHE3<sup>IEC-KO</sup>**  
Abnormal colon  
mucosa, colitis  
score 2

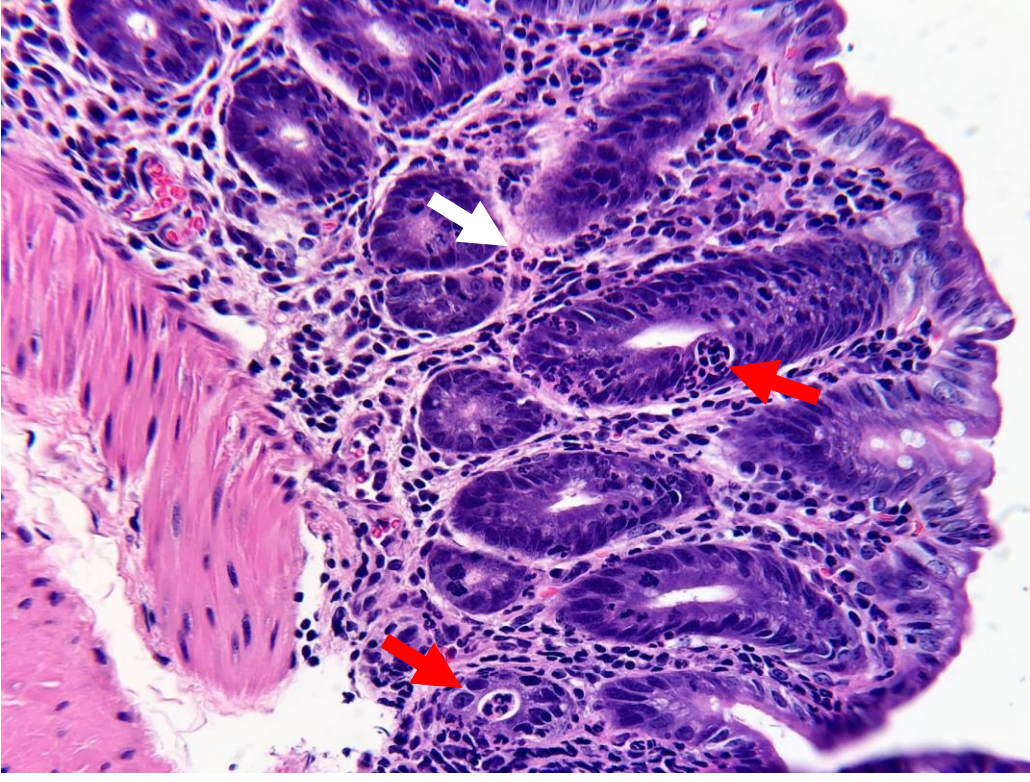

**Supplementary Figure S1. Histopathology of colon mucosa in NHE3<sup>IEC-KO</sup> mice**

(A) Normal colon mucosa of NHE3<sup>IEC-KO</sup> mice. (B) Abnormal colon mucosa in NHE3<sup>IEC-KO</sup> mice showing mild inflammation with cryptitis. White arrows indicate neutrophils in lamina propria and in the crypt epithelial cells (cryptitis). (C) Abnormal colon mucosa in NHE3<sup>IEC-KO</sup> showing moderate inflammation with cryptitis and crypt abscess. White arrows indicate neutrophils and red arrows indicate cryptitis and crypt abscess.
